# Supplementary material for: ResNet Model Automatically Extracts and Identifies FT-NIR Features for Geographical Traceability of Polygonatum kingianum
Source: MDPI journal article supplement (doi:10.3390/foods11223568), 2022-11-09
Supplement: s1 [file s1]

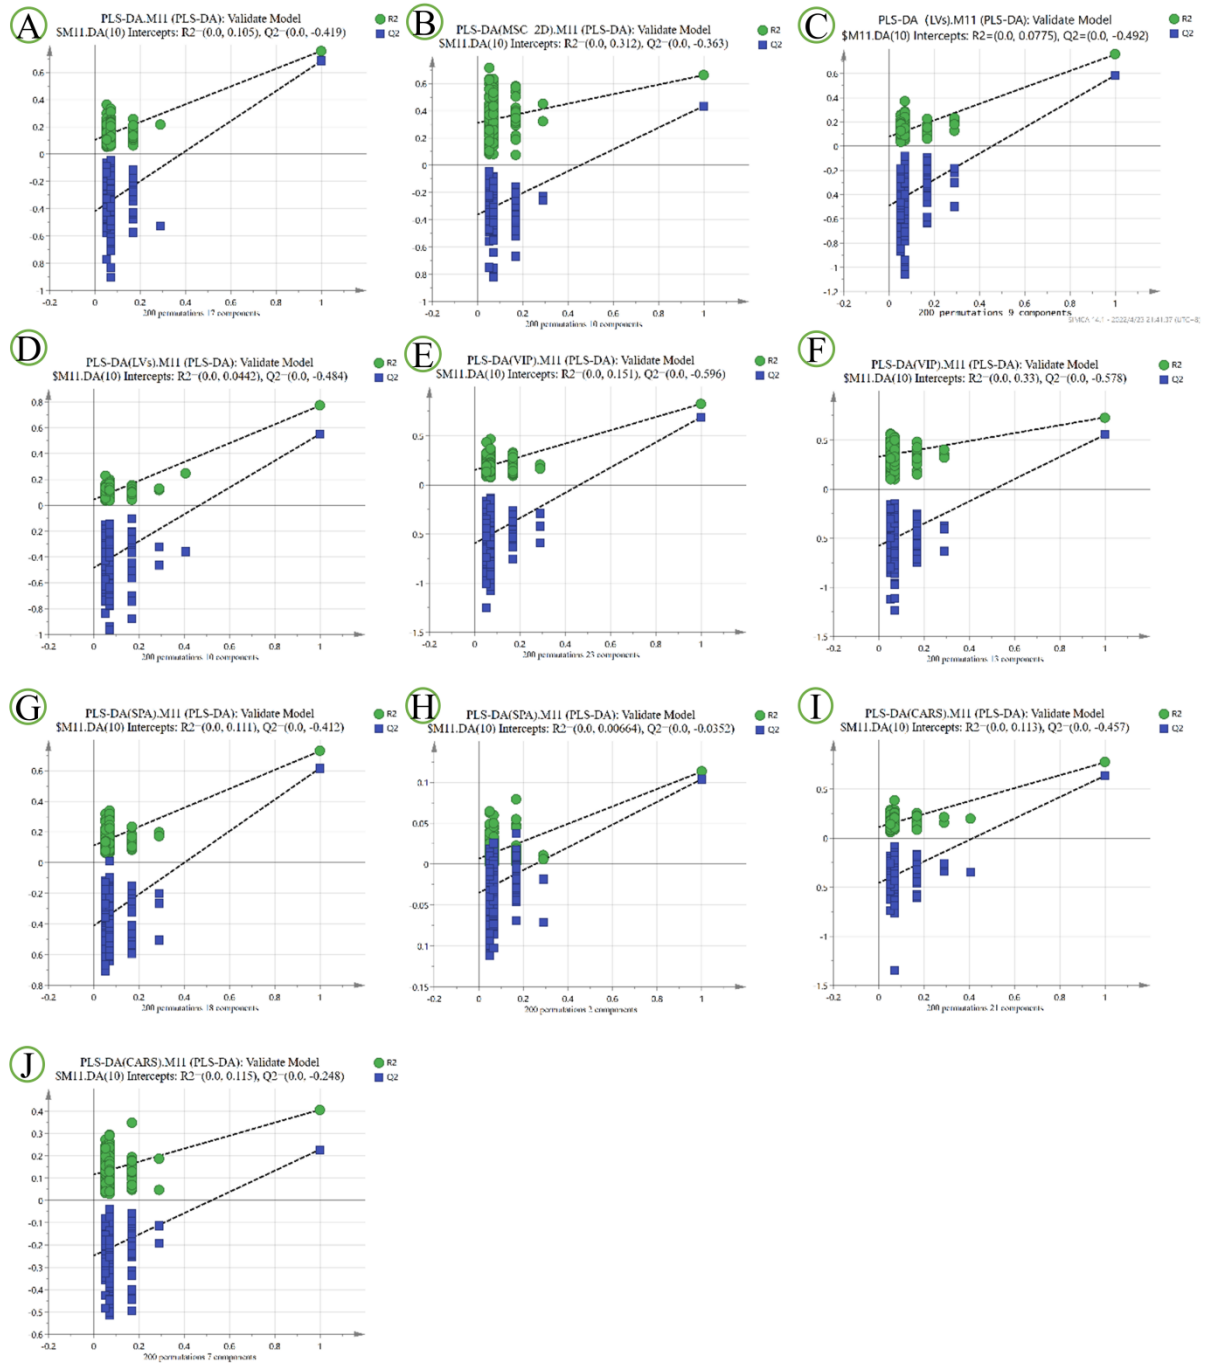

**Figure S1.** 200 Permutation Iteration Tests for PLS-DA Models, without preprocessing (A, C, E, G, I), MSC+SD preprocessing (B, D, F, H, J), without feature extraction (A, B), LVs (C,D), VIP (E, F), SPA (G, H), CARS (I, J).

| A     |         |        |   |    |    |    |   |    |    |    |    |    |
|-------|---------|--------|---|----|----|----|---|----|----|----|----|----|
|       | Members | Acc    | 1 | 2  | 3  | 4  | 5 | 6  | 7  | 8  | 9  | 10 |
| 1     | 10      | 90%    | 9 | 0  | 0  | 1  | 0 | 0  | 0  | 0  | 0  | 0  |
| 2     | 13      | 92.31% | 0 | 12 | 0  | 0  | 0 | 0  | 0  | 1  | 0  | 0  |
| 3     | 22      | 100%   | 0 | 0  | 22 | 0  | 0 | 0  | 0  | 0  | 0  | 0  |
| 4     | 21      | 95.24% | 0 | 1  | 0  | 20 | 0 | 0  | 0  | 0  | 0  | 0  |
| 5     | 6       | 33.33% | 0 | 1  | 0  | 3  | 2 | 0  | 0  | 0  | 0  | 0  |
| 6     | 8       | 100%   | 0 | 0  | 0  | 0  | 0 | 8  | 0  | 0  | 0  | 0  |
| 7     | 10      | 100%   | 0 | 0  | 0  | 0  | 0 | 10 | 0  | 0  | 0  | 0  |
| 8     | 15      | 93.33% | 0 | 1  | 0  | 0  | 0 | 0  | 0  | 14 | 0  | 0  |
| 9     | 27      | 100%   | 0 | 0  | 0  | 0  | 0 | 0  | 0  | 0  | 27 | 0  |
| 10    | 9       | 100%   | 0 | 0  | 0  | 0  | 0 | 0  | 0  | 0  | 0  | 9  |
| Total | 141     | 94.33% | 9 | 15 | 22 | 24 | 2 | 8  | 10 | 15 | 27 | 9  |

| B     |         |        |   |   |   |    |   |   |   |   |    |    |
|-------|---------|--------|---|---|---|----|---|---|---|---|----|----|
|       | Members | Acc    | 1 | 2 | 3 | 4  | 5 | 6 | 7 | 8 | 9  | 10 |
| 1     | 4       | 75%    | 3 | 1 | 0 | 0  | 0 | 0 | 0 | 0 | 0  | 0  |
| 2     | 6       | 83.33% | 0 | 5 | 0 | 0  | 0 | 0 | 0 | 0 | 1  | 0  |
| 3     | 9       | 88.89% | 0 | 0 | 8 | 0  | 0 | 0 | 0 | 1 | 0  | 0  |
| 4     | 9       | 100%   | 0 | 0 | 0 | 9  | 0 | 0 | 0 | 0 | 0  | 0  |
| 5     | 3       | 0%     | 0 | 0 | 0 | 2  | 0 | 1 | 0 | 0 | 0  | 0  |
| 6     | 4       | 100%   | 0 | 0 | 0 | 0  | 0 | 4 | 0 | 0 | 0  | 0  |
| 7     | 4       | 50%    | 0 | 0 | 0 | 0  | 0 | 0 | 2 | 1 | 0  | 1  |
| 8     | 6       | 100%   | 0 | 0 | 0 | 0  | 0 | 0 | 0 | 6 | 0  | 0  |
| 9     | 12      | 100%   | 0 | 0 | 0 | 0  | 0 | 0 | 0 | 0 | 12 | 0  |
| 10    | 4       | 100%   | 0 | 0 | 0 | 0  | 0 | 0 | 0 | 0 | 0  | 4  |
| Total | 61      | 86.89% | 3 | 6 | 8 | 11 | 0 | 5 | 2 | 8 | 13 | 5  |

| C     |         |        |   |    |    |    |   |   |    |    |    |    |
|-------|---------|--------|---|----|----|----|---|---|----|----|----|----|
|       | Members | Acc    | 1 | 2  | 3  | 4  | 5 | 6 | 7  | 8  | 9  | 10 |
| 1     | 10      | 80%    | 8 | 0  | 0  | 2  | 0 | 0 | 0  | 0  | 0  | 0  |
| 2     | 13      | 100%   | 0 | 13 | 0  | 0  | 0 | 0 | 0  | 0  | 0  | 0  |
| 3     | 22      | 95.45% | 0 | 1  | 21 | 0  | 0 | 0 | 0  | 0  | 0  | 0  |
| 4     | 21      | 90.48% | 1 | 1  | 0  | 19 | 0 | 0 | 0  | 0  | 0  | 0  |
| 5     | 6       | 100%   | 0 | 0  | 0  | 0  | 6 | 0 | 0  | 0  | 0  | 0  |
| 6     | 8       | 100%   | 0 | 0  | 0  | 0  | 0 | 8 | 0  | 0  | 0  | 0  |
| 7     | 10      | 100%   | 0 | 0  | 0  | 0  | 0 | 0 | 10 | 0  | 0  | 0  |
| 8     | 15      | 100%   | 0 | 0  | 0  | 0  | 0 | 0 | 0  | 15 | 0  | 0  |
| 9     | 27      | 92.59% | 0 | 1  | 1  | 0  | 0 | 0 | 0  | 0  | 25 | 0  |
| 10    | 9       | 100%   | 0 | 0  | 0  | 0  | 0 | 0 | 0  | 0  | 0  | 9  |
| Total | 141     | 95.04% | 9 | 16 | 22 | 21 | 6 | 8 | 10 | 15 | 25 | 9  |

| D     |         |        |   |   |   |   |   |   |   |   |    |    |
|-------|---------|--------|---|---|---|---|---|---|---|---|----|----|
|       | Members | Acc    | 1 | 2 | 3 | 4 | 5 | 6 | 7 | 8 | 9  | 10 |
| 1     | 4       | 75%    | 3 | 0 | 1 | 0 | 0 | 0 | 0 | 0 | 0  | 0  |
| 2     | 6       | 100%   | 0 | 6 | 0 | 0 | 0 | 0 | 0 | 0 | 0  | 0  |
| 3     | 9       | 88.89% | 0 | 0 | 8 | 1 | 0 | 0 | 0 | 0 | 0  | 0  |
| 4     | 9       | 77.78% | 0 | 1 | 0 | 7 | 1 | 0 | 0 | 0 | 0  | 0  |
| 5     | 3       | 66.67% | 0 | 1 | 0 | 0 | 2 | 0 | 0 | 0 | 0  | 0  |
| 6     | 4       | 100%   | 0 | 0 | 0 | 0 | 0 | 4 | 0 | 0 | 0  | 0  |
| 7     | 4       | 75%    | 0 | 0 | 0 | 0 | 0 | 0 | 3 | 1 | 0  | 0  |
| 8     | 6       | 100%   | 0 | 0 | 0 | 0 | 0 | 0 | 0 | 6 | 0  | 0  |
| 9     | 12      | 100%   | 0 | 0 | 0 | 0 | 0 | 0 | 0 | 0 | 12 | 0  |
| 10    | 4       | 100%   | 0 | 0 | 0 | 0 | 0 | 0 | 0 | 0 | 0  | 4  |
| Total | 61      | 90.16% | 3 | 8 | 9 | 8 | 3 | 4 | 3 | 7 | 12 | 4  |

**Figure S2.** Confusion matrix graph with the best performance in PLS-DA model (based on VIP feature extraction). A (training set without preprocessing), B (testing set without preprocessing), C (training set with MSC and 2D processing), and D (testing set with MSC and 2D processing).
